# Supplementary material for: Precision Oncology beyond Targeted Therapy: Combining Omics Data with Machine Learning Matches the Majority of Cancer Cells to Effective Therapeutics
Source: Oxford University Press journal article supplement (doi:10.1158/1541-7786.mcr-17-0378), 2017-11-13
Supplement: 15417786mcr170378-sup-186401_2_supp_4365901_9yr1gm.xlsx [file 15417786mcr170378-sup-186401_2_supp_4365901_9yr1gm.xlsx]

## Sheet: Sheet1
Supplementary Table S1: FDA approved medications in GDSC
Drug Name	Targets	FDA molecular indication	indication or target measured
AG-014699	PARP1, PARP2	BRCA1, BRCA2	Yes
AICAR	AMPK agonist		No
AP-24534	ABL	BCR_ABL	Yes
ATRA	Retinoic acid and retinoid X receptor agonist	PML_RARA	No
Axitinib	PDGFR, KIT, VEGFR		Yes
AZD-2281	PARP1/2	BRCA1, BRCA2	Yes
Bexarotene	Retinioic acid X family agonist		No
BIBW2992	EGFR, ERBB2	EGFR	Yes
Bicalutamide	Androgen receptor (ANDR)		No
Bleomycin	DNA damage		No
Bortezomib	Proteasome		No
Bosutinib	SRC, ABL, TEC	BCR_ABL	Yes
Cisplatin	DNA crosslinker		No
Cytarabine	DNA synthesis		No
Dasatinib	ABL, SRC, KIT, PDGFR	BCR_ABL	Yes
Docetaxel	Microtubules		No
Doxorubicin	DNA intercalating		No
Erlotinib	EGFR		Yes
Etoposide	TOP2		No
GDC-0449	SMO		No
Gefitinib	EGFR		Yes
Gemcitabine	DNA replication		No
Imatinib	ABL, KIT, PDGFR	BCR_ABL	Yes
Lapatinib	EGFR, ERBB2	ERBB2	Yes
Lenalidomide	TNF alpha		No
Methotrexate	Dihydrofolate reductase (DHFR)		No
Mitomycin C	DNA crosslinker		No
Nilotinib	ABL	BCR_ABL	Yes
Paclitaxel	Microtubules		No
Pazopanib	VEGFR, PDGFRA, PDGFRB, KIT		Yes
PD-0332991	CDK4/6		Yes
PF-02341066	MET, ALK	ALK	Yes
Pyrimethamine	Dihydrofolate reductase (DHFR)		No
Rapamycin	MTOR		No
Sorafenib	PDGFRA, PDGFRB, KDR, KIT, FLT3		Yes
Sunitinib	PDGFRA, PDGFRB, KDR, KIT, FLT3		Yes
Temsirolimus	MTOR		No
Vinblastine	Microtubules		No
Vinorelbine	Microtubules		No
Vorinostat	HDAC inhibitor Class I, IIa, IIb, IV		No
FDA approved indication measured
FDA approved indication not measured
molecular target measured
nonspecific therapy
